1 **Environmental cholera (*Vibrio cholerae*) dynamics in an estuarine system in southern**  
2 **coastal Ecuador**

3

4 ***RH: Dynamics of Vibrio cholerae in southern Ecuador***

5

6 Sadie J. Ryan<sup>\*1,2</sup>, Anna M. Stewart Ibarra<sup>3</sup>, Eunice Ordóñez<sup>4</sup>, Winnie Chu<sup>5</sup>, Julia L. Finkelstein<sup>5</sup>,

7 Christine A. King<sup>6</sup>, Luis E. Escobar<sup>3,7</sup>, Christina Lupone<sup>3</sup>, Froilan Heras<sup>3</sup>, Erica Tauzer<sup>3</sup>, Egan

8 Waggoner<sup>3</sup>, Tyler G. James<sup>1,2</sup>, Washington B. Cárdenas<sup>4</sup>, Mark Polhemus<sup>3</sup>

9 \*Corresponding author: [sjryan@ufl.edu](mailto:sjryan@ufl.edu), (352) 294-7513

10 1. Department of Geography and Emerging Pathogens Institute. University of Florida,  
11 Gainesville, FL, USA.

12 2. Emerging Pathogens Institute. University of Florida, Gainesville, FL, USA.

13 3. Center for Global Health and Translational Science, SUNY Upstate Medical University,  
14 Syracuse, NY, USA.

15 4. Laboratorio de Biomedicina, FCV, Escuela Superior Politécnica del Litoral, Guayaquil,  
16 Ecuador.

17 5. Division of Nutritional Sciences, Cornell University, Ithaca NY, USA

18 6. Department of Microbiology and Immunology, SUNY Upstate Medical University,  
19 Syracuse, NY, USA.

20 7. Department of Fisheries, Wildlife, and Conservation Biology, University of Minnesota, Saint  
21 Paul, MN, USA.

22

23 **Keywords:** Cholera, Ecuador, *Vibrio cholerae*, strains O1 and O139, *Vibrio*, temperature, spatial

24 **Word count:** 3616

25

26 **Acknowledgments**

27 We would like to thank the citizens and authorities of Machala, Ecuador, for their continued  
28 support of our research infectious diseases epidemiology and monitoring. This project was  
29 supported under a grant from DOD-GEIS P0435\_14\_UN. The authors have no conflict of  
30 interests.

31

32 **Abstract**

33 Cholera emergence is strongly linked to local environmental and ecological context. The 1991-  
34 2004 pandemic emerged in Perú and spread north into Ecuador's El Oro province, making this a  
35 key site for potential re-emergence. Machala, El Oro, is a port city of 250,000, near the Peruvian  
36 border. Many livelihoods depend on the estuarine system, from fishing for subsistence and trade,  
37 to domestic water use. In 2014, we conducted biweekly sampling for 10 months in five estuarine  
38 locations, across a gradient of human use, and ranging from inland to ocean. We measured  
39 water-specific environmental variables implicated in cholera growth and persistence: pH,  
40 temperature, salinity, and algal concentration, and evaluated samples in 5 months for pathogenic  
41 and non-pathogenic *Vibrio cholerae*, by polymerase chain reaction (PCR). We found  
42 environmental persistence of pandemic strains O1 and O139, but no evidence for toxigenic  
43 strains. Cholera presence was coupled to algal and salinity concentration, and sites exhibited  
44 considerable seasonal and spatial heterogeneity. This study indicates that environmental  
45 conditions in Machala are optimal for cholera re-emergence, with risk peaking during  
46 September, and higher risk near urban periphery low-income communities. This highlights a  
47 need for surveillance of this coupled cholera– estuarine system to anticipate potential future  
48 cholera outbreaks.

## 49 **Introduction**

50 Cholera remains a severe global threat to public health and development efforts (WHO 2013).  
51 According to the World Health Organization, the burden of cholera is at least 100 times greater  
52 than current estimates (Zuckerman et al. 2007; WHO 2013), with 120,000 deaths and 3-5 million  
53 cases each year worldwide. Previous studies suggest that outbreaks of cholera can be explained  
54 by oceanographic variables (e.g., sea surface temperature, pH, salinity) and phytoplankton  
55 blooms, indicating the potential to predict disease outbreaks (Jutla et al. 2010; Jutla et al. 2013).  
56 A recent analysis of global cholera pandemics indicates that cholera outbreaks originate in  
57 coastal regions, often during flood events, before spreading inland (Jutla et al. 2010). Our own  
58 previous work suggests that both current and future coastal hotspots of cholera transmission are  
59 far larger than current surveillance efforts can capture, with considerably higher potential  
60 exposure than previously estimated (Escobar et al. 2015). Estuarine systems are a natural  
61 intersection of coastal oceanographic conditions and human use; as productive systems for  
62 fisheries, port locations for transport, and rich riparian soils, they are a highly exposed interface  
63 for humans. Particularly because coastal estuarine systems often represent subsistence-level  
64 dependence on the interface, in terms of artisanal fisheries, a higher likelihood of direct water  
65 use, and simply greater physical exposure by proximity, it is also the most vulnerable of  
66 populations that are most likely to be exposed to pathogens and the most flooding prone areas in  
67 the world (Nicholls 1995; Dixon et al. 2006; De Sherbinin et al. 2007; Hanson et al. 2011;  
68 Hallegatte et al. 2013; Cai et al. 2014).

69 The causative agent of human cholera, *Vibrio cholerae*, is thought to originate from  
70 estuarine waters, based on phylogenetic information and its physiological requirements for  
71 growth and persistence (Colwell and Huq 1994; Colwell 2004). *Vibrio cholerae* is endemic in

72 the Bay of Bengal (Bangladesh and India) and along coastal areas in Latin America (Lipp et al.  
73 2002; Mutreja et al. 2011), and it persists environmentally in riverine, estuarine, and coastal  
74 waters around the world (Lipp et al. 2002), Cholera epidemics have been found to follow  
75 coastlines (Colwell 1996), and *V. cholerae* can be transmitted to humans via a wide range of  
76 marine organisms, including zooplankton, aquatic plants, shellfish, and fish (Vezzulli et al.  
77 2010).

78 Ecuador is a critical location to understand cholera and other climate and water-sensitive  
79 diseases due to its (1) high potential for cholera outbreaks and the high incidence of other  
80 climate-sensitive infectious diseases (e.g., leptospirosis, dengue), and (2) the strong influence of  
81 oceanographic conditions on local climate and flooding during El Niño events (Rossel et al.  
82 1996; Rossel and Cadier 2009; Hanson et al. 2011; Hallegatte et al. 2013; Cai et al. 2014).  
83 Indeed, in January 1991, cholera re-emerged in Latin America after more than a century without  
84 cases (Lacey 1995). In Ecuador, the 1991 cholera epidemic emerged in the south of the country  
85 from a small fishing village in El Oro Province, and it is suspected that a fisherman introduced  
86 the index case was traveling north from Perú (Dixon et al. 2006). From 1991 to 2004 over 90,000  
87 cases of cholera were reported in Ecuador, with most cases from coastal provinces. El Oro and  
88 Guayas provinces, located in southern coastal Ecuador, encompassed one of two disease  
89 epicenters in the country. Recent studies suggest there is a high risk of a second epidemic in  
90 Ecuador due to the presence of important risk factors including the growth of vulnerable urban  
91 populations, decreased investment in cholera surveillance and prevention programs, increased  
92 flood risk associated with climate change, and a street food culture that includes eating raw  
93 shellfish (ceviche) (Malavade et al. 2011). In addition, Guayaquil (Guayas Province), the largest  
94 city in Ecuador, has been identified as the third most vulnerable city in the world to future flood

95 risk (Hallegatte et al. 2013). Furthermore, it has been found that in populations with a high  
96 prevalence of blood group O, such as in Latin America, illness from cholera is more severe, and  
97 the requirements for rehydration and hospitalization of infected individuals are considerably  
98 higher (Swerdlow et al. 1994; Nelson et al. 2009). Given these conditions, there is compelling  
99 evidence that people in southern coast of Ecuador are a high-risk population and there is a  
100 critical need for active cholera surveillance in this region.

101 To address this, we evaluated local variability in the presence of cholera in the estuarine  
102 environment surrounding the city of Machala, El Oro province, a site identified as a current and  
103 future coastal cholera hotspot (Escobar et al. 2015). We selected five sampling sites associated  
104 with estuarine water access in Machala, Ecuador, representing a range of economic and human  
105 activity conditions, in addition to different proximity to the ocean. Using water sampling  
106 methodology, coupled with laboratory identification of *Vibrio cholerae* bacteria, we assessed the  
107 local environmental and pathogenic conditions over a period of ten months. Strengthening  
108 climate and water-sensitive infectious disease surveillance systems (WHO 2003; Zuckerman et  
109 al. 2007) and further understanding of the role of environmental factors in disease outbreak and  
110 transmission over time and space (Sedas 2007; Akanda et al. 2013) are urgently needed to target  
111 cholera and other climate and water sensitive diseases.

112

## 113 **Methodology**

### 114 **Study Site**

115 Machala is a port city of approximately 250,000 inhabitants, with major economic activities  
116 stemming from agriculture (bananas), aquaculture (shrimp farming), and fishing/shellfish  
117 collection, both small-scale and semi-industrial scale. Five sampling sites were established

118 within the Machala estuarine system (Figure 1), selected for maximum heterogeneity, to include  
119 highly built urban areas, ports, mangrove, and coastal sampling areas. The five sites were: Isla  
120 Jambelí, Boca del Macho, Puerto Bolívar Boca, Puerto Bolívar Adentro, and Héroes de Jambelí.  
121 Isla Jambelí site is on the outer edge of the coastal draining estuary, and the entrance to Jambelí  
122 is interspersed with mangroves and shrimp farms. Boca del Macho is the open edge of the inner  
123 estuary, in open water on shallow sand, with mangroves. Puerto Bolívar Boca is near the mouth  
124 of the open harbor, characterized by heavy boat traffic, commercial fishing, and residences lining  
125 the waterway, with mangroves and shrimp farming on the far side of the waterway. Puerto  
126 Bolívar Adentro is further into the city, along the estuary, characterized by residential low-  
127 income housing, with shrimp farms and mangroves across the Héroes waterway. Heroes de  
128 Jambelí is the most inland site, characterized by low income and poor quality housing built along  
129 mangroves at the edge of the city; outflow from the houses is visible directly into the water  
130 (Figure 1). The port city of Machala is an important sentinel surveillance site, due to its location  
131 along the Pan American highway, approximately 80km north of the Peruvian border, facilitating  
132 significant movement of people and potential pathogens by land and sea.

133

### 134 **Water sampling**

135 At each of the five study sites (Figure 1), water sampling was conducted at high tide, twice  
136 monthly along a transect with 3 sub-sites spaced 250 m apart, and 3 replicates per subsite. Three  
137 1L surface water samples per subsite were collected in sterile polypropylene bottles, and placed  
138 in coolers with ice for transport for the laboratory. For environmental sampling, using a YSI  
139 water probe\* (600 XLM V2 Sonde), we recorded Surface Temperature (°C), Conductivity, pH,

140 Salinity, and Optic-T BGA PE (Phycoerythrin) [blue-green algae] (cells/ml, which we converted  
141 to cells/ $\mu$ l for ease of visualization) at each end of the transect.

142

### 143 **Laboratory analyses**

144 Water samples were transferred to the laboratory in coolers for *Vibrio cholerae* testing and were  
145 processed within 24 hours of collection. For laboratory analysis, a 1L water sample was filtered  
146 through a Whatman membrane No. 1 and 0.22  $\mu$ m membrane (Millipore) by vacuum. Then,  
147 10mL of Phosphate Buffered Saline (PBS) (pH 7.4) was pipetted onto the retained contents on  
148 the membrane and gently washed by pipette 15x. The PBS was left on the membrane to incubate  
149 at room temperature for 15 minutes prior to collection in 50mL conical tube.

150

### 151 **DNA isolation and PCR**

152 Genomic DNA was extracted from bacterial pellet of the previous step with a QIAamp DNA  
153 mini kit (Qiagen), following manufacture instructions. Diagnosis of cholera serogroups and the  
154 detection of toxigenic genes were performed each by duplex PCR. Table 1 describes primers sets  
155 used to amplify the *rfb* region of O1 and O139 serogroups and the toxin subunit A (*ctxA*) and  
156 toxin coregulated pilus (*tcpA*) genes. For both duplex PCRs, master mix was as follows: 0.05  
157 U/ $\mu$ l of JumpStart REDTaq DNA Polymerase (Sigma), 1X buffer, 0.2 mM dNTPs, 0.2 mM of  
158 each primer set, 1  $\mu$ l of template and ultrapure water to a final volume of 25  $\mu$ l. The  
159 amplification program for diagnosis of serogroups was adapted from Hoshino et al.(Hoshino et  
160 al. 1998), using the following conditions: 5 minutes at 94°C, 35 cycles of 94°C for 1 minute,  
161 55°C for 1 minute and 72°C for 1 minute and final extension of 72°C for 7 minutes. Positive  
162 samples for either or both serogroups were subjected to toxigenic genes duplex PCR. The



163 amplification program was according to conditions described in Kumar et al.(Kumar et al. 2010):  
164 3 minutes at 94°C, 30 cycles of 94°C for 30 seconds, 59°C for 30 seconds and 72°C for 1.2  
165 minutes, and final extension of 72°C for 10 minutes. PCR products were resolved in a 2%  
166 agarose gel and sequenced to verify gene amplification.

167

## 168 **Statistical analyses**

169 As the data were not normally distributed, we conducted non-parametric tests throughout. We  
170 characterized the sampling sites for each environmental variable: Temperature, pH, Salinity, and  
171 BGA, conducting Kruskal-Wallis rank sum tests on site means, and on monthly means. We then  
172 examined whether *V. cholerae* prevalence at sites, and strain (i.e., O1, O139) prevalence  
173 separately, was associated with environmental variables using a series of non-parametric  
174 Kendall's tau correlations.

175

## 176 **Results**

### 177 **Environmental characteristics**

178 The probe recorded a range of 9-104 readings at each sub-site biweekly for 10 months. We  
179 pooled all readings by month for analyses. Our sample sites differed significantly in  
180 environmental characteristics (Figure 2), as shown by a series of Kruskal-Wallis rank sum tests  
181 (Temperature:  $\chi^2 = 206.19$ ,  $df = 4$ ,  $p < 0.0001$ ; Salinity:  $\chi^2 = 2257.5$ ,  $df = 4$ ,  $p < 0.0001$ ; pH:  $\chi^2 =$   
182  $1347.3$ ,  $df = 4$ ,  $p < 0.0001$ ; BGA  $\chi^2 = 1824.8$ ,  $df = 4$ ,  $p < 0.0001$ ). We found that Héroes de  
183 Jambelí, the most inland site, had the highest BGA, and that Isla de Jambelí, the most coastal  
184 site, had the highest salinity; while there were statistical differences between all sites in all the  
185 environmental variables, there were no clear outliers in the other variables. Our sample sites

186 exhibited significant change in environmental characteristics across months (Figure 3), as shown  
187 by a series of Kruskal-Wallis rank sum tests (Table 2). Temperature was lowest in August for all  
188 sites – likely reflecting pacific upwelling, which cools the water, regardless of air temperature.  
189 Salinity at the most inland site, Héroes de Jambelí, was consistently lowest, and showed the  
190 smallest change across months, while the other sites had a decrease in salinity in May, then a rise  
191 from July-December. Isla de Jambelí had the highest salinity, reflecting its location on the most  
192 coastal site. BGA was highest at the most inland site, Héroes de Jambelí, peaking in May,  
193 lagging temperature by a month. BGA shows the least temporal or spatial clustered pattern and  
194 has no obvious seasonality across the year. Heroes de Jambeli, however, registered the highest  
195 BGA values during the study (~25,000). pH appears to peak in December-January across all  
196 sites, with a decrease in July-August; the coastal and inland sites showed low pH values across  
197 seasons, while Boca del Macho registered consistently high pH values across months.

198

### 199 **Laboratory analyses**

200 Of a total of 405 individual water samples, collected between May – September, 382 were  
201 diagnosed by PCR. We found 139 (36.4%) samples positive for *V. cholerae*, and 243 (64%)  
202 negative. We found both O1 and O139 serogroups of *V. cholerae* present in the estuarine system  
203 studied in Machala, Ecuador. Serogroup O139 was predominant; 118 (83.5%) samples were  
204 O139, and 51 (35.3%) were O1 (30 samples contained both). We were able to detect *V.*  
205 *cholerae* during each of the 5 months of sampling, nevertheless we found that prevalence  
206 decreased drastically in July (Figure 4). By sequencing the samples, we confirmed that the PCR  
207 protocol applied was proper for detection of *V. cholerae* serogroups O1 and O139 strains.

208

## 209 ***Vibrio cholerae* characteristics**

210 We pooled water samples within sites, to derive monthly *V. cholerae* prevalences across and  
211 within sites (prevalence = positive/total samples tested). Overall monthly prevalence of *V.*  
212 *cholerae* ranged from 0.3 (n=68) in July to 0.58 (n=45) in September, with site prevalence  
213 ranging 0-1, with a mean monthly site prevalence of 0.35 (Figure 4A). Individual strain  
214 prevalence was generally higher for O139 than O1, but we see that Puerto Bolívar Adentro and  
215 Héroes de Jambelí were *V. cholerae* positive in every month and also had higher prevalences  
216 than the other sites (Figure 4B and 4C). We found that the prevalence of *V. cholerae*, and O139  
217 and O1 strains separately, were significantly associated with higher BGA (blue-green algae  
218 densities), and that prevalence of *V. cholerae* the O1 strain were significantly associated with  
219 lower salinity. We found no significant association between prevalence and temperature or pH  
220 (Table 3).

221

## 222 **Discussion and Recommendations**

223 We found evidence of an environmental reservoir of *V. cholerae* in the estuarine waters of  
224 Machala, Ecuador, in 2014. We confirmed the presence of *V. cholerae*, including pandemic  
225 strains O1 and O139. We cannot rule out ongoing toxigenic presence, but we did not detect it in  
226 our samples.

227 Our sites exhibited considerable seasonal and spatial heterogeneity in environmental  
228 variables and *V. cholerae* prevalence, with clear peaks (and troughs) during specific months. For  
229 example, we found peak *V. cholerae* prevalence in September, with highest values in two sites:  
230 – Héroes de Jambelí and Puerto Bolívar Adentro (Figure 1), these sites are characterized by low  
231 income housing on the edge of the city, while being inland sites, facing mangroves and shrimp

232 farms, and were found to have *V. cholerae* present in every month sampled. The lowest *V.*  
233 *cholerae* prevalence was found in July, in which only the two most inland sites had *V. cholerae*  
234 detection. Water temperature had the clearest temporal pattern, falling rapidly through July,  
235 likely corresponding to Pacific upwelling, cooling the waters, and increasing nutrients in the  
236 system (Strutton et al. 2001). We found that there was lowest salinity in the most inland site,  
237 Héroes de Jambelí, and a higher concentration of BGA than in other sites. This is in contrast to  
238 Isla Jambelí, a small island community furthest from the mainland and closest to the ocean, with  
239 high salinity due to its coastal location; however, it did not have lower BGA than other sites.

240 We found that the timing of *V. cholerae* was coupled to the environmental variables we  
241 measured. For example, water temperature, BGA, and pH decreased in most sites through  
242 July/August, so did the overall prevalence of *V. cholerae*, but we only demonstrated significant  
243 associations between prevalence and site and month specific levels of salinity and BGA. Average  
244 ocean salinity is around 35 ppt, while freshwater rivers average around 0.5 ppt; clearly in this  
245 estuarine system, we see a mixed or brackish system, ranging from the lower average of around  
246 15 ppt at our most inland site, to a high approaching 34 ppt at our coastal site. We detected *V.*  
247 *cholerae* at a range of salinities, finding a negative correlation with increasing salinity,  
248 suggesting that the lower salinity may provide a more suitable environment for the growth of *V.*  
249 *cholerae*, but that even the higher salinity approaching ocean concentrations do not prevent that  
250 growth. This finding is consistent with previous work demonstrating the suitability of coastal  
251 oceans for *V. cholerae* (Strutton et al. 2001), but reveals a finer scale relationship with salinity as  
252 we move inland in an estuarine system, up the gradient to fresh water.

253 BGA (blue-green algae; a.k.a. cyanobacteria) are photosynthetic prokaryotes that can be  
254 found in freshwater, marine, and terrestrial environments (Stanier and Bazine 1977). The

255 photosynthetic pigments of cyanobacteria include chlorophyll-*a* and the phycobiliprotein  
256 phycoerythrin. Here we use BGA values to characterize water features and because BGA has  
257 been associated with *V. cholerae* persistence (Epstein 1993). However, BGA itself also poses a  
258 significant threat to humans through its production of cyanotoxins. BGA toxins include  
259 neurotoxins, hepatotoxins, cytotoxins, irritants and gastrointestinal toxins (Codd et al. 2005).  
260 Among these chemicals, microcystin, is a known liver carcinogen (Hunter 1998), and has been  
261 detected in marine ecosystems (Miller et al. 2010). Exposure to these via skin contact, inhalation,  
262 or ingestion, can result in a range of effects, from skin irritation and conjunctivitis, to kidney  
263 damage and respiratory arrest (Codd et al. 1999). The World Health Organization (WHO)  
264 recognizes BGA blooms as an emerging public health risk, and recommends the development of  
265 early warning systems to detect scums (World Health Organization 1999; Falconer 2001;  
266 Manganelli et al. 2012). We argue that BGA related diseases should be included in differential  
267 diagnosis in Héroes de Jambelí, particularly during May, when a BGA increase was evident in  
268 this study.

269       Temperature increase, coupled with high nutrient load, low flow, and thermal  
270 stratification, generally results in increased growth rates of cyanobacteria, and its dominance in  
271 the phytoplankton community (Davis et al. 2009; Elliott 2010; Huber et al. 2012). This could  
272 explain the high BGA values early in the year (Figure 3). In addition, warm temperatures  
273 promote increases in the number of days where BGA biomass exceeds thresholds established by  
274 WHO (Davis et al. 2009; Elliott 2012). High temperature influences water column stability and  
275 mixing depth, producing favorable conditions for BGA blooms (Robarts and Zohary 1987; Stal  
276 et al. 2003). This association of temperature increase with BGA blooms is consistent across  
277 coastal, estuarine, and inland waters (Paerl 1988). Thus, long term monitoring to measure BGA

278 biomass should be considered at least in Heroes de Jambeli and Puerto Bolivar -the sites report  
279 the highest BGA values (Figure 2), particularly considering that a rise in water temperature is  
280 associated with BGA emergence (Wasmund 1997; Kanoshina et al. 2003; Suikkanen et al. 2007),  
281 increasing the risk of BGA diseases with imminent future climate warming.

282         In Ecuador, seawater eutrophication is a public health problem (World Health  
283 Organization 1999). In fact, several species of BGA have been identified in aquatic environments  
284 in Ecuador (Gunkel and Casallas 2002; Nedbalová and Sklenár 2008; Ramírez-Luna et al. 2008).  
285 Unfortunately, while there is an increasing recognition of the negative health effects of BGA  
286 blooms, monitoring in coastal marine waters is rare, and efforts are strongly biased to freshwater  
287 systems (Nedbalová and Sklenár 2008), making our exploration in estuarine areas a crucial  
288 update to the status of BGA in the country. This study was conducted in an average climate year,  
289 providing a preliminary framework for monitoring coupled *V. cholerae* – estuarine dynamics for  
290 potential emergence of cholera outbreaks in the region. This is particularly useful baseline  
291 information for anticipating El Niño years, extreme climate events associated with warming  
292 temperatures of surface ocean water and increased rainfall and flooding events. Climate change  
293 projections indicate that the frequency of extreme El Niño events will increase in the future, (Cai  
294 et al. 2014) increasing the risk of water-borne diseases endemic in the region, such as cholera,  
295 typhoid, and leptospirosis, and provides valuable information to add *V. cholerae* in the public  
296 health agenda to consider infectious diseases beyond the already important vector-borne  
297 diseases, such as dengue fever, chikungunya, zika, and malaria.

298         Indeed, by May 2016, two years after the initiation of this study, the first case of cholera  
299 was reported in Machala, after approximately 12 years with no case reports in Ecuador (2016).  
300 An immuno-compromised individual was confirmed positive for *V. cholerae* serotype O1 non-

301 toxigenic, by the National Public Health Research Institute of the Ministry of Health. Our team  
302 diagnosed the patient using the same PCR assay described here. Although the source of the  
303 infection was not confirmed, this case report suggests a worrisome link to the results of our  
304 epidemiological survey, and merits further examination.

305         This study highlights the urgency for active epidemiological surveys and the need for  
306 public health interventions to reduce the risk of water-borne pathogens in vulnerable populations  
307 from a holistic social-ecological perspective. The community Héroes de Jambelí is a low-income  
308 peri-urban settlement with less than 50 families, established informally in 2002. The community  
309 continues to lack adequate access to piped water, sewerage, and garbage collection due to their  
310 status as an illegal settlement. Simple bamboo homes have built over the mangrove system, with  
311 direct discharge of wastewater into the estuary. At the same time, this community's livelihood  
312 depends on artisanal fisheries (e.g., crabs, mollusks) from these same estuaries. This vulnerable  
313 coupled human-natural system results in high risk of emerging epidemics from water-borne  
314 pathogens.

315         The results of this study, coupled with ongoing and previously published remote sensing  
316 and GIS assessments, will allow us to identify geographic areas for future *V. cholerae*  
317 surveillance across coastal Ecuador. In the future, we anticipate sampling additional sites where  
318 we have identified geographic algal bloom hotspots, but which do not have historic reports of  
319 cholera emergence – to serve as control sites for analyses, and to provide background levels of  
320 *Vibrio* and other pathogens. This information will inform the development of predictive maps  
321 and population attributable fractions to help translate surveillance and modeling data into  
322 numbers that can inform policy development, identification of communities at increased risk of  
323 cholera, and preventive interventions. Other future projects will include: continued development

324 of a training program in infectious disease surveillance, development of a web-based GIS  
325 platform to integrate data sources and examine the role of environmental factors in *V. cholerae*  
326 transmission over time and space, and development of an early warning system for climate-  
327 sensitive diseases.



328 **References**

- 329 Akanda AS, Jutla AS, Gute DM, Sack RB, Alam M, Huq A, Colwell RR, Islam S (2013)  
330 Population Vulnerability to Biannual Cholera Outbreaks and Associated Macro-Scale  
331 Drivers in the Bengal Delta.
- 332 Cai W, Borlace S, Lengaigne M, Van Rensch P, Collins M, Vecchi G, Timmermann A, Santoso  
333 A, McPhaden MJ, Wu L (2014) Increasing frequency of extreme El Niño events due to  
334 greenhouse warming. *Nat Clim Change* 4:111–116.
- 335 Codd GA, Bell SG, Kaya K, Ward CJ, Beattie KA, Metcalf JS (1999) Cyanobacterial toxins,  
336 exposure routes and human health. *Eur J Phycol* 34:405–415.
- 337 Codd GA, Morrison LF, Metcalf JS (2005) Cyanobacterial toxins: risk management for health  
338 protection. *Toxicol Appl Pharmacol* 203:264–272.
- 339 Colwell RR (2004) Infectious disease and environment: cholera as a paradigm for waterborne  
340 disease. *Int Microbiol* 7:285–289.
- 341 Colwell RR (1996) Global climate and infectious disease: the cholera paradigm. *Science*  
342 274:2025.
- 343 Colwell RR, Huq A (1994) Environmental Reservoir of *Vibrio cholerae* The Causative Agent of  
344 Choleraa. *Ann N Y Acad Sci* 740:44–54. doi: 10.1111/j.1749-6632.1994.tb19852.x
- 345 Davis TW, Berry DL, Boyer GL, Gobler CJ (2009) The effects of temperature and nutrients on  
346 the growth and dynamics of toxic and non-toxic strains of *Microcystis* during  
347 cyanobacteria blooms. *Harmful Algae* 8:715–725.

- 348 De Sherbinin A, Schiller A, Pulsipher A (2007) The vulnerability of global cities to climate  
349 hazards. *Environ Urban* 19:39–64.
- 350 Dixon TH, Amelung F, Ferretti A, Novali F, Rocca F, Dokka R, Sella G, Kim S-W, Wdowinski  
351 S, Whitman D (2006) Space geodesy: Subsidence and flooding in New Orleans. *Nature*  
352 441:587–588.
- 353 Elliott A (2012) Predicting the impact of changing nutrient load and temperature on the  
354 phytoplankton of England’s largest lake, Windermere. *Freshw Biol* 57:400–413.
- 355 Elliott J (2010) The seasonal sensitivity of cyanobacteria and other phytoplankton to changes in  
356 flushing rate and water temperature. *Glob Change Biol* 16:864–876.
- 357 Epstein PR (1993) Algal blooms in the spread and persistence of cholera. *Biosystems* 31:209–  
358 221.
- 359 Escobar LE, Ryan SJ, Stewart-Ibarra AM, Finkelstein JL, King CA, Qiao H, Polhemus ME  
360 (2015) A global map of suitability for coastal *Vibrio cholerae* under current and future  
361 climate conditions. *Acta Trop* 149:202–211.
- 362 Falconer IR (2001) Toxic cyanobacterial bloom problems in Australian waters: risks and impacts  
363 on human health. *Phycologia* 40:228–233.
- 364 Gunkel G, Casallas J (2002) Limnology of an equatorial high mountain lake—Lago San Pablo,  
365 Ecuador: the significance of deep diurnal mixing for lake productivity. *Limnol-Ecol*  
366 *Manag Inland Waters* 32:33–43.

- 367 Hallegatte S, Green C, Nicholls RJ, Corfee-Morlot J (2013) Future flood losses in major coastal  
368 cities. *Nat Clim Change* 3:802–806.
- 369 Hanson S, Nicholls R, Ranger N, Hallegatte S, Corfee-Morlot J, Herweijer C, Chateau J (2011)  
370 A global ranking of port cities with high exposure to climate extremes. *Clim Change*  
371 104:89–111.
- 372 Hoshino K, Yamasaki S, Mukhopadhyay AK, Chakraborty S, Basu A, Bhattacharya SK, Nair  
373 GB, Shimada T, Takeda Y (1998) Development and evaluation of a multiplex PCR assay  
374 for rapid detection of toxigenic *Vibrio cholerae* O1 and O139. *FEMS Immunol Med*  
375 *Microbiol* 20:201–207.
- 376 Huber V, Wagner C, Gerten D, Adrian R (2012) To bloom or not to bloom: contrasting  
377 responses of cyanobacteria to recent heat waves explained by critical thresholds of abiotic  
378 drivers. *Oecologia* 169:245–256.
- 379 Hunter P (1998) Cyanobacterial toxins and human health. *J Appl Microbiol* 84:35–40.
- 380 Jutla A, Akanda AS, Huq A, Faruque ASG, Colwell R, Islam S (2013) A water marker  
381 monitored by satellites to predict seasonal endemic cholera. *Remote Sens Lett* 4:822–  
382 831.
- 383 Jutla AS, Akanda AS, Islam S (2010) Tracking Cholera in Coastal Regions Using Satellite  
384 Observations1. *JAWRA J Am Water Resour Assoc* 46:651–662.

- 385 Kanoshina I, Lips U, Leppänen J-M (2003) The influence of weather conditions (temperature  
386 and wind) on cyanobacterial bloom development in the Gulf of Finland (Baltic Sea).  
387 *Harmful Algae* 2:29–41.
- 388 Kumar P, Peter WA, Thomas S (2010) Rapid detection of virulence-associated genes in  
389 environmental strains of *Vibrio cholerae* by multiplex PCR. *Curr Microbiol* 60:199–202.
- 390 Lacey SW (1995) Cholera: calamitous past, ominous future. *Clin Infect Dis* 20:1409–1419.
- 391 Lipp EK, Huq A, Colwell RR (2002) Effects of global climate on infectious disease: the cholera  
392 model. *Clin Microbiol Rev* 15:757–770.
- 393 Malavade SS, Narvaez A, Mitra A, Ochoa T, Naik E, Sharma M, Galwankar S, Breglia MD,  
394 Izurieta R (2011) Cholera in Ecuador: Current relevance of past lessons learnt. *J Glob  
395 Infect Dis* 3:189.
- 396 Manganelli M, Scardala S, Stefanelli M, Palazzo F, Funari E, Vichi S, Buratti FM, Testai E  
397 (2012) Emerging health issues of cyanobacterial blooms. *Ann Dell'Istituto Super Sanità*  
398 48:415–428.
- 399 Miller MA, Kudela RM, Mekebre A, Crane D, Oates SC, Tinker MT, Staedler M, Miller WA,  
400 Toy-Choutka S, Dominik C (2010) Evidence for a novel marine harmful algal bloom:  
401 cyanotoxin (microcystin) transfer from land to sea otters. *PLoS One* 5:e12576.
- 402 Mutreja A, Kim DW, Thomson NR, Connor TR, Lee JH, Kariuki S, Croucher NJ, Choi SY,  
403 Harris SR, Lebens M, others (2011) Evidence for several waves of global transmission in  
404 the seventh cholera pandemic. *Nature* 477:462–465.

- 405 Nedbalová L, Sklenár P (2008) New records of snow algae from the Andes of Ecuador. *Arnaldoa*  
406 15:17–20.
- 407 Nelson EJ, Harris JB, Morris JG, Calderwood SB, Camilli A (2009) Cholera transmission: the  
408 host, pathogen and bacteriophage dynamic. *Nat Rev Microbiol* 7:10.1038/nrmicro2204.  
409 doi: 10.1038/nrmicro2204
- 410 Nicholls RJ (1995) Coastal megacities and climate change. *GeoJournal* 37:369–379.
- 411 Paerl HW (1988) Nuisance phytoplankton blooms in coastal, estuarine, and inland waters.  
412 *Limnol Oceanogr* 33:823–843.
- 413 Ramírez-Luna V, Navia AF, Rubio EA (2008) Food habits and feeding ecology of an estuarine  
414 fish assemblage of northern Pacific Coast of Ecuador. *Pan-Am J Aquat Sci* 3:361–372.
- 415 Robarts RD, Zohary T (1987) Temperature effects on photosynthetic capacity, respiration, and  
416 growth rates of bloom-forming cyanobacteria. *N Z J Mar Freshw Res* 21:391–399.
- 417 Rossel F, Cadier E (2009) El Niño and prediction of anomalous monthly rainfalls in Ecuador.  
418 *Hydrol Process* 23:3253–3260. doi: 10.1002/hyp.7401
- 419 Rossel F, Cadier E, Gómez G (1996) Las inundaciones en la zona costera ecuatoriana: causas ---  
420 obras de protección existentes y previstas. l'Institut francais d'études Andines (IFE)
- 421 Sedas VTP (2007) Influence of environmental factors on the presence of *Vibrio cholerae* in the  
422 marine environment: a climate link. *J Infect Dev Ctries* 1:224–241.
- 423 Stal LJ, Albertano P, Bergman B, von Bröckel K, Gallon JR, Hayes PK, Sivonen K, Walsby AE  
424 (2003) BASIC: Baltic Sea cyanobacteria. An investigation of the structure and dynamics

- 425 of water blooms of cyanobacteria in the Baltic Sea—responses to a changing  
426 environment. *Cont Shelf Res* 23:1695–1714.
- 427 Stanier R, Bazine G (1977) Phototrophic prokaryotes: the cyanobacteria. *Annu Rev Microbiol*  
428 31:225–274.
- 429 Strutton PG, Ryan JP, Chavez FP (2001) Enhanced chlorophyll associated with tropical  
430 instability waves in the equatorial Pacific. *Geophys Res Lett* 28:2005–2008.
- 431 Suikkanen S, Laamanen M, Huttunen M (2007) Long-term changes in summer phytoplankton  
432 communities of the open northern Baltic Sea. *Estuar Coast Shelf Sci* 71:580–592.
- 433 Swerdlow DL, Mintz ED, Rodriguez M, Tejada E, Ocampo C, Espejo L, Barrett TJ, Petzelt J,  
434 Bean NH, Seminario L (1994) Severe life-threatening cholera associated with blood  
435 group 0 in peru: implications for the latin american epidemic. *J Infect Dis* 170:468–472.
- 436 Vezzulli L, Pruzzo C, Huq A, Colwell RR (2010) Environmental reservoirs of *Vibrio cholerae*  
437 and their role in cholera. *Environ Microbiol Rep* 2:27–33.
- 438 Wasmund N (1997) Occurrence of cyanobacterial blooms in the Baltic Sea in relation to  
439 environmental conditions. *Int Rev Gesamten Hydrobiol Hydrogr* 82:169–184.
- 440 WHO (2013) Cholera Annual Report. *Wkly Epidemiol Rec* 321–336.
- 441 WHO (2003) Cholera Unveiled: Global Task. Force on Cholera Control. World Health  
442 Organization Geneva
- 443 World Health Organization (1999) Toxic Cyanobacteria in Water: A guide to their public health  
444 consequences, monitoring and management.

445 Zuckerman JN, Rombo L, Fisch A (2007) The true burden and risk of cholera: implications for  
446 prevention and control. *Lancet Infect Dis* 7:521–530.

447 (2016) Epidemiological Update: Cholera. 27 May, Washington, D.C.: PAHO/WHO; 2016. Pan  
448 American Health Organization / World Health Organization., Washington, D.C.

449

450

451

452 **Table 1.** PCR primers set used in this study

| Set | Primer | Sequence                      | Product | Reference                                        |
|-----|--------|-------------------------------|---------|--------------------------------------------------|
| 1   | O1F2-1 | GTT TCA CTG AAC AGA TGG G     | 192 bp  | (Hoshino et al. 1998)                            |
|     | O1R2-2 | CGG TCA TCT GTA AGT ACA AC    |         | Development and evaluation of a                  |
| 2   | O139F2 | AGC CTC TTT ATT ACG GGT GG    | 449bp   | multiplex PCR assay for rapid                    |
|     | O139R2 | GTC AAA CCC GAT CGT AAA GG    |         | detection of toxigenic <i>Vibrio</i>             |
| 3   | tcpA-F | ATG CAA TTA TTA AAA CAG CTT   | 675bp   | <i>cholerae</i> O1 and O139                      |
|     |        | TTT AAG                       |         | (Kumar et al. 2010)                              |
|     | tcpA-R | TTA GCT GTT ACC AAA TGC AAC   |         | Rapid Detection of Virulence-                    |
|     |        | AG                            |         | Associated Genes in Environmental                |
| 4   | ctxA-F | CGG GCA GAT TCT AGA CCT CCT G | 564bp   | Strains of <i>Vibrio cholerae</i> by             |
|     | ctxA-R | CGA TGA TCT TGG AGC ATT CCC   |         | Multiplex PCR                                    |
|     |        | AC                            |         | (Singh et al. 2002)                              |
|     |        |                               |         | Development of a hexaplex PCR                    |
|     |        |                               |         | assay for rapid detection of                     |
|     |        |                               |         | virulence and regulatory genes in                |
|     |        |                               |         | <i>Vibrio cholerae</i> and <i>Vibrio mimicus</i> |

453

454



455 **Table 2.** Kruskal-Wallis rank sum test results for each site and environmental variable

456 differences by month.

457

| <i>Environmental Variable</i> | <i>Site</i>         | <i>X<sup>2</sup></i> | <i>DF</i> | <i>p-value</i> |
|-------------------------------|---------------------|----------------------|-----------|----------------|
| Temperature                   | Boca de Macho       | 832.65               | 9         | 0.0001         |
|                               | Héroes de Jambelí   | 643.85               | 8         | 0.0001         |
|                               | Isla de Jambelí     | 622.85               | 9         | 0.0001         |
|                               | Puerto Bolívar      | 445.99               | 9         | 0.0001         |
|                               | Adentro             |                      |           |                |
|                               | Puerto Bolívar Boca | 625.44               | 9         | 0.0001         |
| Salinity                      | Boca de Macho       | 837.16               | 9         | 0.0001         |
|                               | Héroes de Jambelí   | 230.17               | 8         | 0.0001         |
|                               | Isla de Jambelí     | 671.41               | 9         | 0.0001         |
|                               | Puerto Bolívar      | 464.85               | 9         | 0.0001         |
|                               | Adentro             |                      |           |                |
|                               | Puerto Bolívar Boca | 619.21               | 9         | 0.0001         |
| pH                            | Boca de Macho       | 534.3                | 9         | 0.0001         |
|                               | Héroes de Jambelí   | 431.66               | 8         | 0.0001         |
|                               | Isla de Jambelí     | 245.91               | 9         | 0.0001         |
|                               | Puerto Bolívar      | 378.53               | 9         | 0.0001         |
|                               | Adentro             |                      |           |                |
|                               | Puerto Bolívar Boca | 416.76               | 9         | 0.0001         |
| BGA                           | Boca de Macho       | 650.84               | 9         | 0.0001         |
|                               | Héroes de Jambelí   | 309.2                | 8         | 0.0001         |
|                               | Isla de Jambelí     | 469.75               | 9         | 0.0001         |
|                               | Puerto Bolívar      | 219.78               | 9         | 0.0001         |
|                               | Adentro             |                      |           |                |
|                               | Puerto Bolívar Boca | 519.81               | 9         | 0.0001         |

458

459 **Table 3:** Kendall tau tests for correlation between prevalence of cholera, and each strain

460 separately, and environmental variables at sites, pooled monthly.

461

| <b>Environmental Variable</b> | <b>Prevalence</b>  | <b>Kendall's <math>\tau</math></b> | <b>z</b> | <b>p-value</b> |
|-------------------------------|--------------------|------------------------------------|----------|----------------|
| Temperature                   | <i>V. cholerae</i> | 0.08                               | 0.56     | 0.57           |
|                               | O1                 | 0.12                               | 0.80     | 0.42           |
|                               | O139               | 0.02                               | 0.12     | 0.91           |
| Salinity                      | <i>V. cholerae</i> | -0.34                              | -2.35    | <b>0.02</b>    |
|                               | O1                 | -0.35                              | -2.29    | <b>0.02</b>    |
|                               | O139               | -0.28                              | -1.92    | 0.06           |
| pH                            | <i>V. cholerae</i> | -0.10                              | -0.68    | 0.49           |
|                               | O1                 | -0.14                              | -0.92    | 0.36           |
|                               | O139               | -0.10                              | -0.64    | 0.52           |
| BGA                           | <i>V. cholerae</i> | 0.55                               | 3.76     | <b>0.00</b>    |
|                               | O1                 | 0.48                               | 3.09     | <b>0.00</b>    |
|                               | O139               | 0.49                               | 3.34     | <b>0.00</b>    |

462

463

464 **Figures**

465

466 **Figure 1:** Location of sampling sites. **A.** Ecuador (in yellow) in South America, indicating the  
467 location of Machala (red point); **B.** Location of Machala on the southern coast of Ecuador (red  
468 point); **C.** Location of the five sampling sites: Isla Jambelí, Boca del Macho, Puerto Bolívar  
469 Boca, Puerto Bolívar Adentro, and Héroes de Jambeli (red points), in and around Machala  
470 (green).

471

472 **Figure 2:** Environmental features in the study area. Water characteristics by site (means and  
473 standard errors Temperature (TEMP, °C), Salinity (SAL), pH, and measured total concentration  
474 of blue-green algae (BGA, cells/μL).

475

476 **Figure 3:** Environmental features in the study period. Water characteristics by month (means  
477 and standard errors) and sites: **A.** Temperature (TEMP, °C), **B.** Salinity (SAL), **C.** measured total  
478 concentration of blue-green algae (BGA, cells/μL), and **D.** pH.

479

480 **Figure 4:** *Vibrio cholerae* detection. Monthly site prevalence of **A.** cholera as given by positive  
481 PCR test, **B.** O1 strain, **C.** O139 strain.

482

483 **Figure 1**

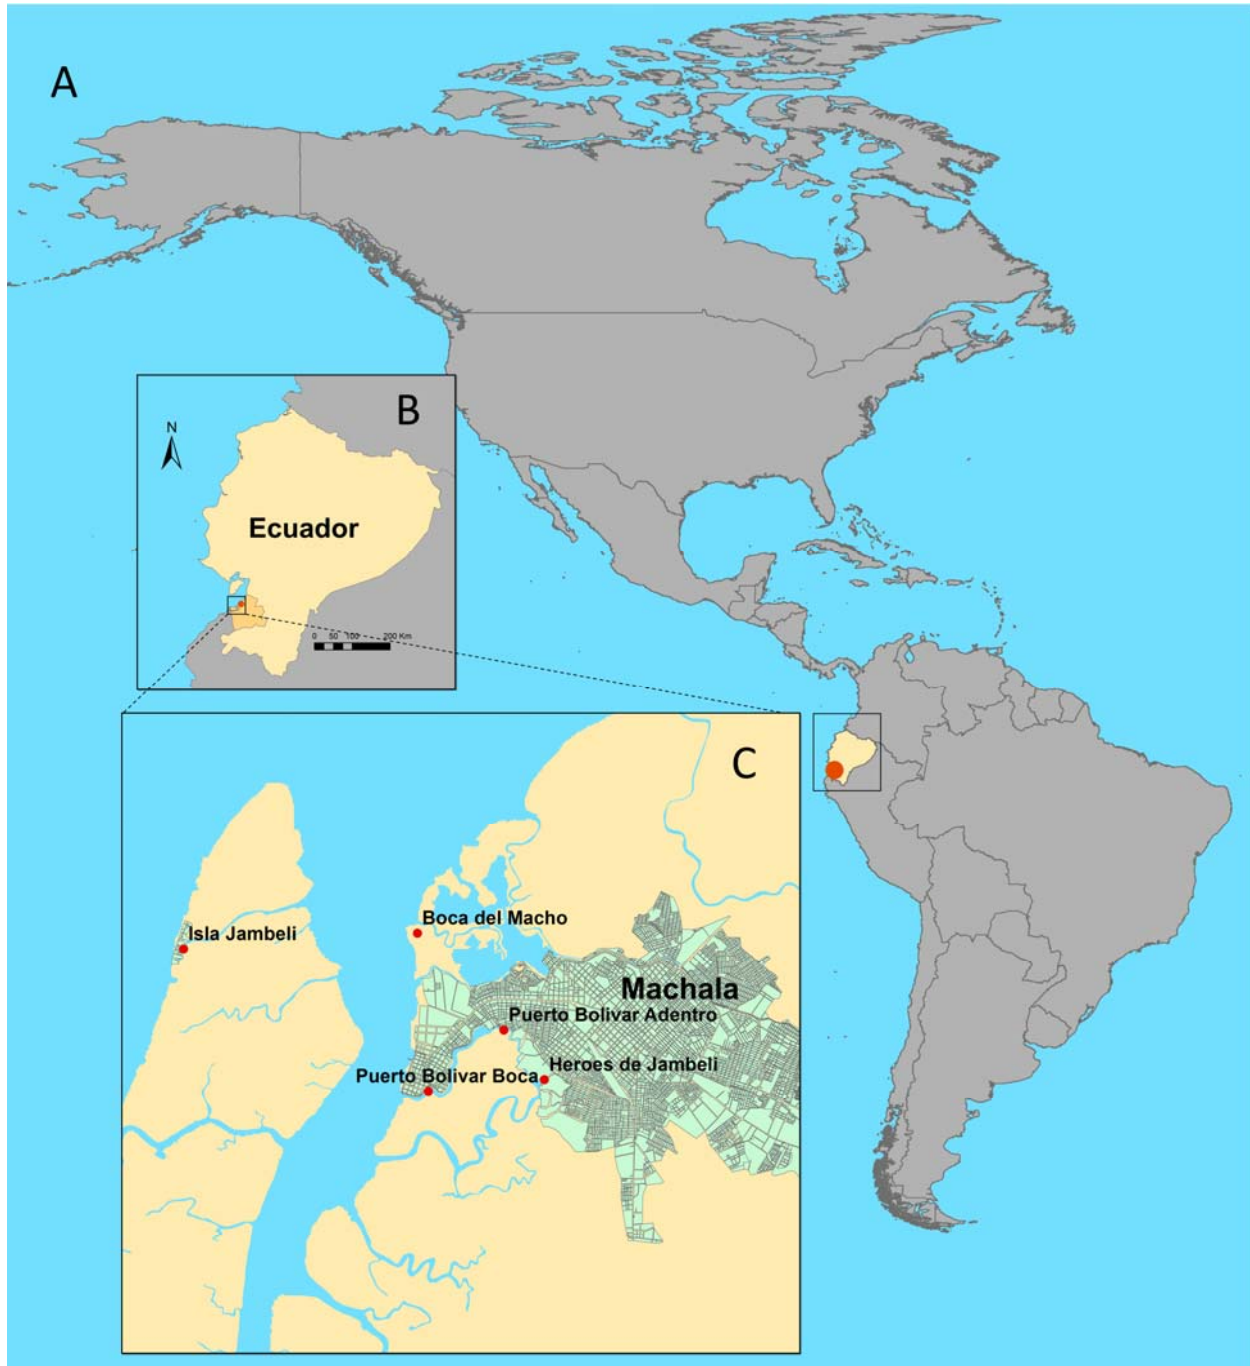

484

485

486 **Figure 2**

487

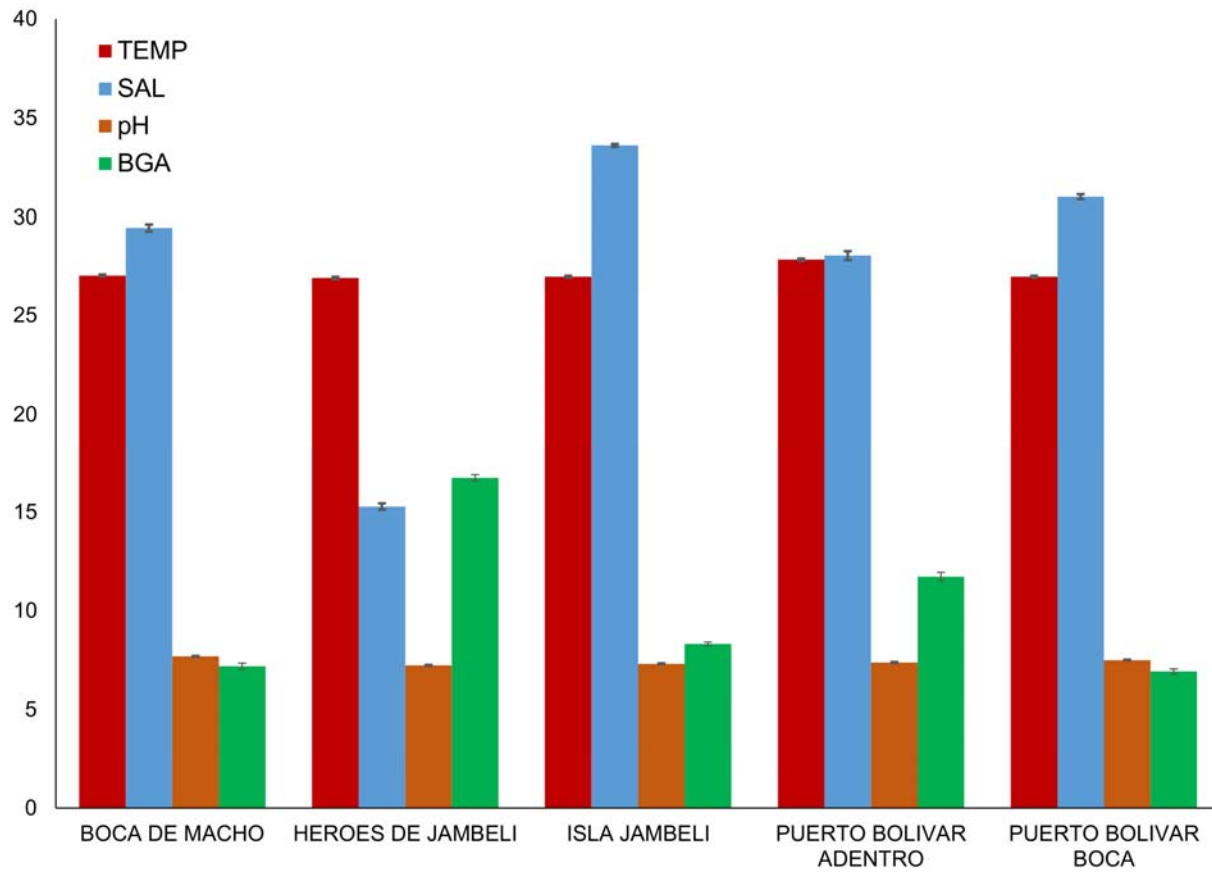

488

489

490 **Figure 3**

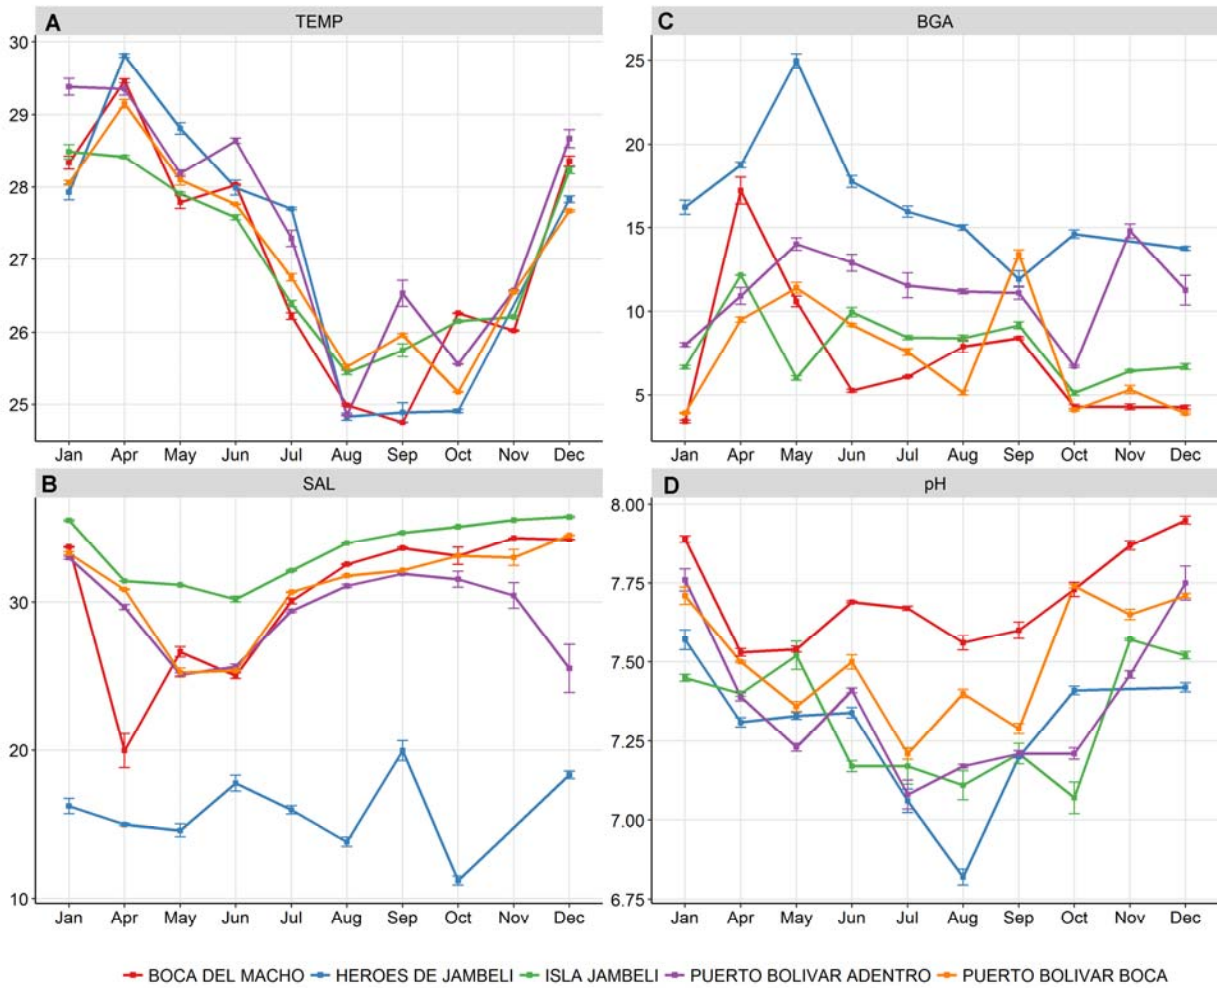

491

492

493 **Figure 4**

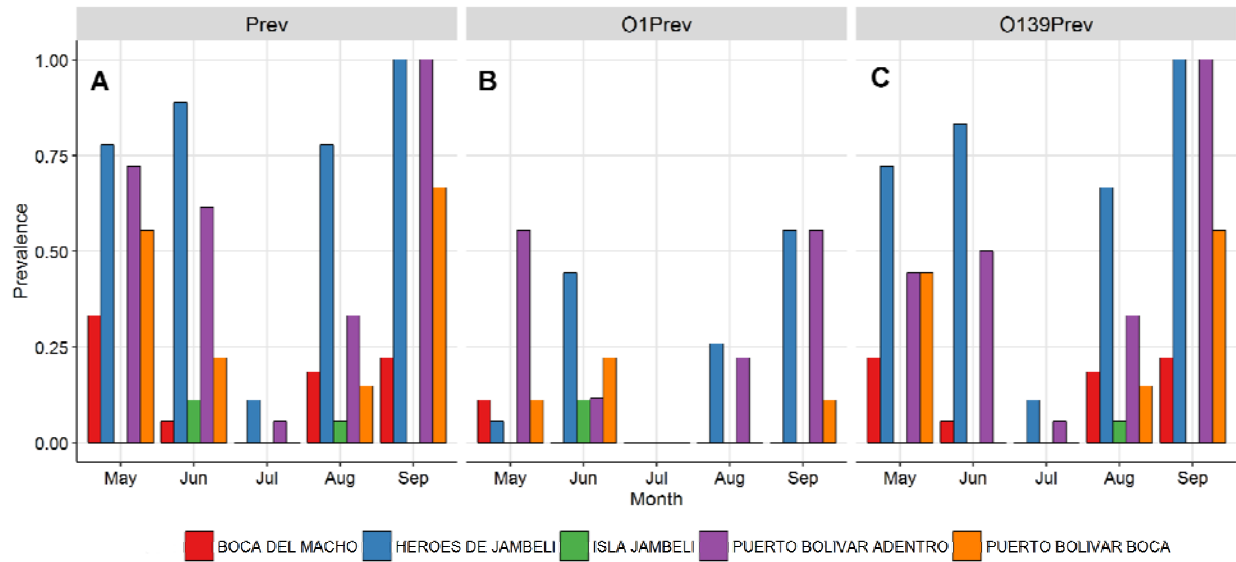

494
